# Supplementary material for: Quantitative Assessment of Elagolix Enzyme-Transporter Interplay and Drug–Drug Interactions Using Physiologically Based Pharmacokinetic Modeling
Source: Springer Nature journal article supplement (doi:10.1007/s40262-019-00833-6), 2019-11-12
Supplement: MOESM1 [file 17378776]

**Clinical Pharmacokinetics**

Quantitative Assessment of Elagolix Enzyme-Transporter Interplay  
and Drug-Drug Interaction Using Physiologically-Based  
Pharmacokinetics Modeling

Manoj S. Chiney<sup>1</sup>, Juki Ng<sup>1</sup>, John P. Gibbs<sup>1</sup>, Mohamad Shebley<sup>1</sup>

<sup>1</sup>*Clinical Pharmacology and Pharmacometrics, AbbVie, North Chicago, IL, USA*

**AUTHOR ORCID NUMBERS**

Manoj S. Chiney: 0000-0003-3679-9363

Juki Ng: 0000-0002-8402-3271

John P. Gibbs: 0000-0001-8892-7318

Mohamed Shebley: 0000-0002-0147-8933

**Corresponding Author:**

Mohamad Shebley, PhD  
AbbVie Inc.

Clinical Pharmacology and Pharmacometrics  
Department R4PK, Building AP31-3  
1 North Waukegan Road  
North Chicago, IL 60064  
Email: [mohamad.shebley@abbvie.com](mailto:mohamad.shebley@abbvie.com)

**Supplemental Table 1:** Demographic information of the population representative used for the simulations.

|                                       |                       |
|---------------------------------------|-----------------------|
| <b>Sex</b>                            | Male                  |
| <b>Age (Years)</b>                    | 20                    |
| <b>Weight (kg)</b>                    | 81                    |
| <b>Height (cm)</b>                    | 177                   |
| <b>BSA (m<sup>2</sup>)</b>            | 1.98                  |
| <b>BMI (kg/m<sup>2</sup>)</b>         | 25.9                  |
| <b>Haematocrit (%)</b>                | 43.0                  |
| <b>HSA (g/L)</b>                      | 47.3                  |
| <b>Serum Creatinine (μmol/L)</b>      | 76.5                  |
| <b>GFR (mL/min/1.73m<sup>2</sup>)</b> | 136                   |
| <b>Renal Function</b>                 | 1.13                  |
| <b>OATP1B1 Status</b>                 | Extensive transporter |
| <b>CYP P450 Status</b>                | Extensive metabolizer |

**Supplemental Table 2: Simulation Design for PK and DDI studies**

| Study                   | Drug                       | Route | Dose   | Time of Administration | Fasting/Fed | Duration | Simulation Population     |
|-------------------------|----------------------------|-------|--------|------------------------|-------------|----------|---------------------------|
| Multiple Ascending Dose | Elagolix                   | PO    | 150 mg | QD for 21 days         | Fasting     | 23 days  | Population Representative |
| Multiple Ascending Dose | Elagolix                   | PO    | 200 mg | BID for 21 days        | Fasting     | 23 days  | Population Representative |
| Rifampin DDI Study      | Elagolix (Victim)          | PO    | 150 mg | SD on Day 1 and Day 10 | Fasting     | 13 days  | Population Representative |
|                         | Rifampin (Perpetrator)     | PO    | 600 mg | QD 12 days             | Fasting     | 13 days  | Population Representative |
| Ketoconazole DDI Study  | Elagolix (Victim)          | PO    | 150 mg | SD on Day 4            | Fasting     | 8 days   | Population Representative |
|                         | Ketoconazole (Perpetrator) | PO    | 400 mg | QD for 6 days          | Fasting     | 8 days   | Population Representative |
| Midazolam DDI Study     | Midazolam (Victim)         | PO    | 5 mg   | SD Day 14              | Fasting     | 17 days  | Population Representative |
|                         | Elagolix (Perpetrator)     | PO    | 150 mg | QD for 16 days         | Fasting     | 17 days  | Population Representative |
| Digoxin DDI Study       | Digoxin (Victim)           | PO    | 0.5 mg | QD Day 1 and Day 10    | Fasting     | 13 days  | Population Representative |
|                         | Elagolix (Perpetrator)     | PO    | 200 mg | BID for 13 days        | Fasting     | 13 days  | Population Representative |
| Midazolam DDI Study     | Midazolam (Victim)         | PO    | 5 mg   | SD Day 14              | Fasting     | 17 days  | Population Representative |
|                         | Elagolix (Perpetrator)     | PO    | 200 mg | BID for 16 days        | Fasting     | 17 days  | Population Representative |
| Digoxin DDI Study       | Digoxin (Victim)           | PO    | 0.5 mg | QD Day 1 and Day 10    | Fasting     | 13 days  | Population Representative |
|                         | Elagolix (Perpetrator)     | PO    | 150 mg | QD for 13 days         | Fasting     | 13 days  | Population Representative |

*BID* twice daily, *DDI* drug-drug interaction, *PO* orally, *QD* once daily, *SD* single dose.

**Supplemental Figure 1:** Sensitivity Analysis to assess the impact of choice of OATP1B1 Jmax parameter on the predicted elagolix AUC ratio following co-administration with single dose of rifampin.

### Sensitivity Analysis to identify OATP1B1 Jmax

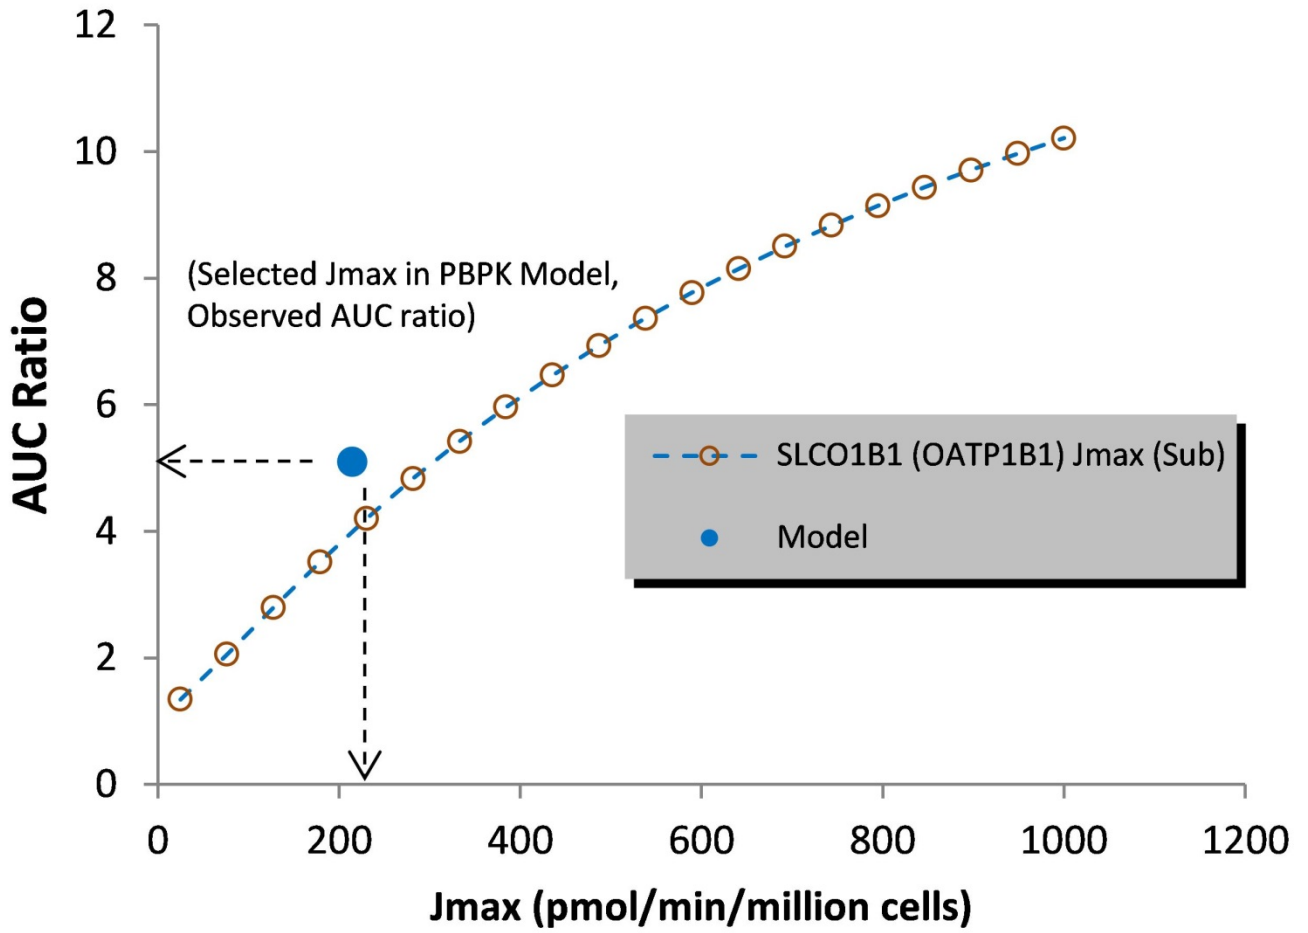

**Supplemental Figure 2:** Sensitivity Analysis to assess the impact of choice of CYP3A4 CLint parameter on the predicted elagolix AUC ratio following co-administration with single dose of ketoconazole

### Sensitivity Analysis to Optimize CYP3A CLint

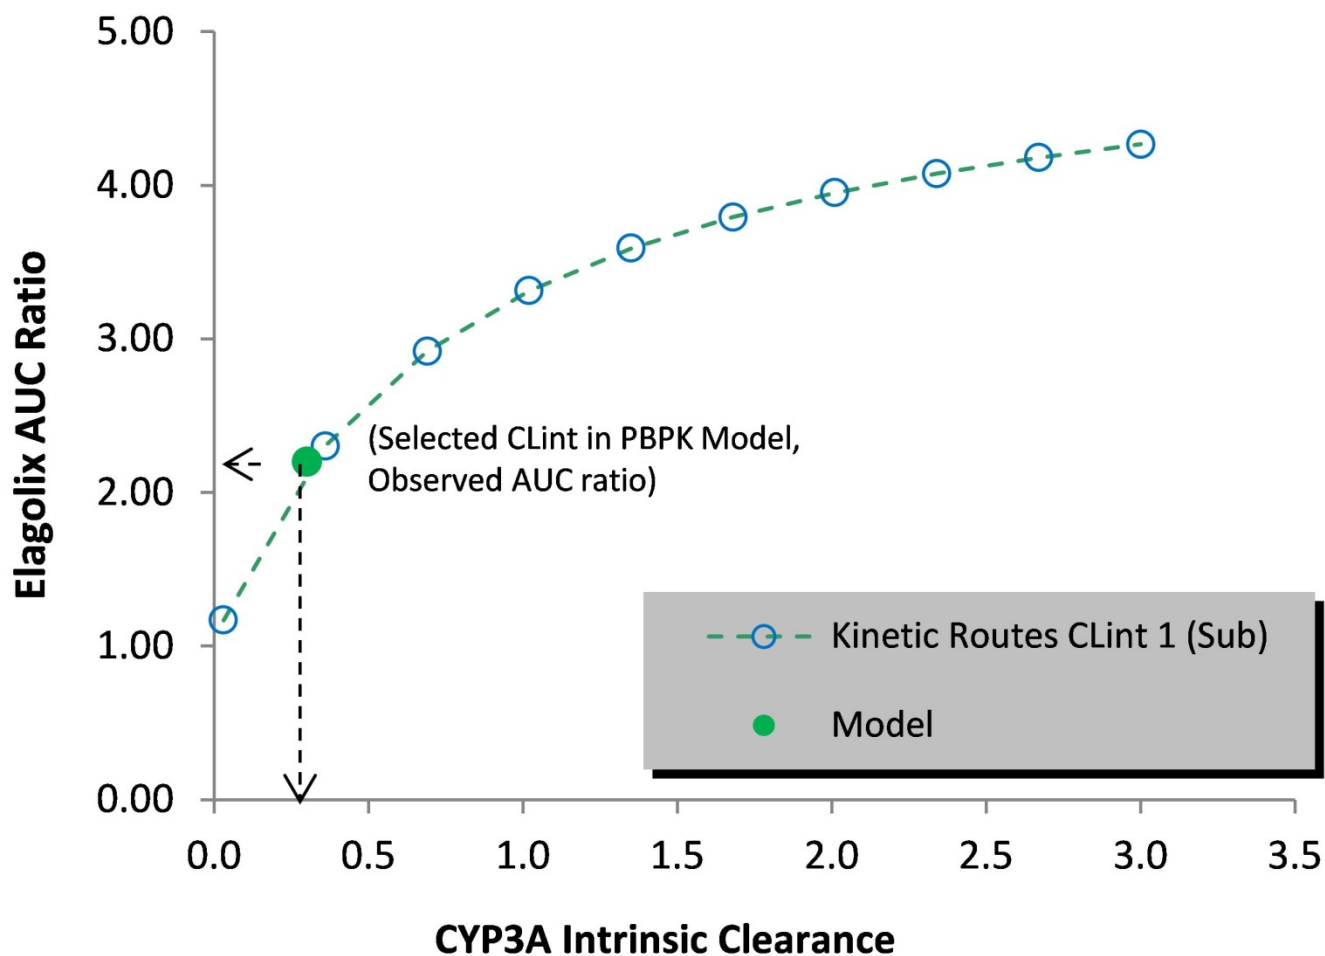

**Supplemental Figure 3:** Sensitivity Analysis to identify the P-gp fold induction that captures the observed DDI of Digoxin with Rifampin.

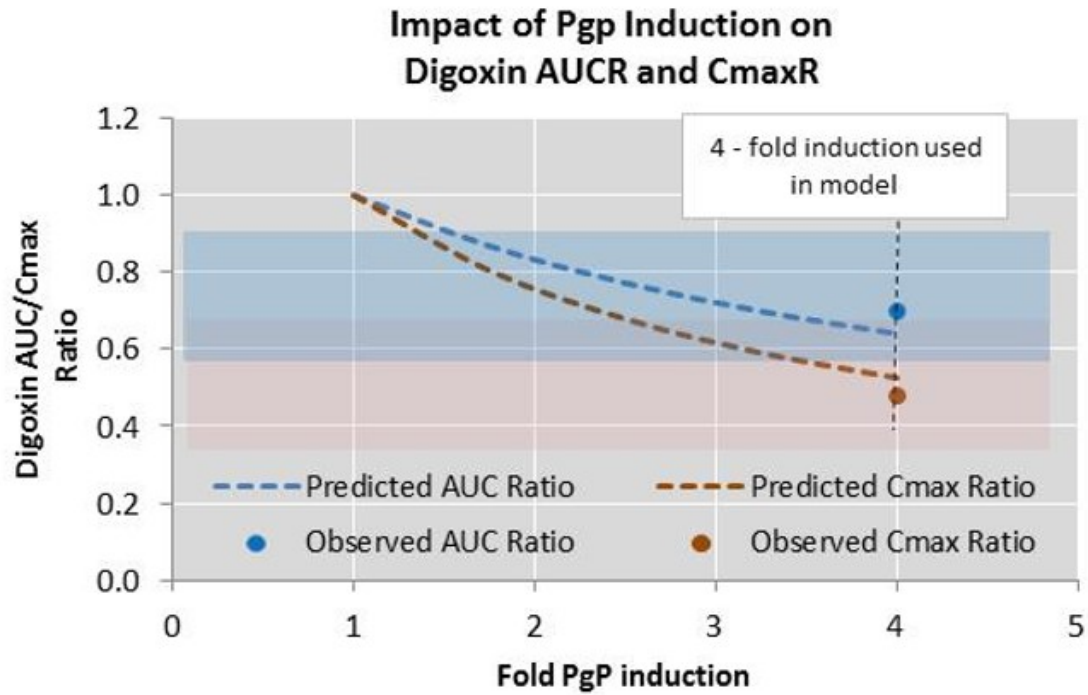

Shaded regions (blue and red) indicate the range of acceptance criteria based on Guest et. al.
